# Supplementary material for: The relationship of large city out-of-hospital cardiac arrests and the prevalence of COVID-19
Source: PubMed Central journal article supplement (PMC8102707; doi:10.1016/j.eclinm.2021.100815), 2021-04-07
Supplement: mmc1.pdf [file mmc1.pdf]

## **APPENDIX – Collaborating Study Group Contributing Investigators**

The Contributing Investigators from the *Metropolitan EMS Medical Directors Global Alliance* (“Eagles”) and their affiliated collaborators have provided de facto consent to publish their information by submission of their agency’s data and by participating in a formal survey and request for these applicable data. They also participated in internal review of the primary findings.

### **The contributing study group investigators included the following persons:**

- *American College of Emergency Physicians*: Sandra M. Schneider, MD (forum co-host)
- *National Association of EMS Physicians*: Michael K. Levy, MD; Jose Cabanas, MD (President and President-Elect and forum co-hosts) -- also see Anchorage & Raleigh below.
- *National Association of Emergency Medical Technicians*: Craig A. Manifold, DO (forum co-host; now deceased)
- Greater Broward EMS Medical Directors Association:  
Peter M. Antevy, MD; Randy S. Katz, DO & James P. Roach, DO (satellite conference hosts)

Albuquerque, NM: Kimberly Pruett, MD  
Anchorage, AK: Michael Levy MD  
Atlanta, GA: Lekshmi Kumar, MD  
Auckland, NZ: Craig Ellis, MD  
Austin-Travis County, TX: Mark Escott, MD, MPH and Jeff Hayes, LP, MPH  
Baltimore, MD: Benjamin Lawner, DO  
Berlin, Germany: Stefan Poloczek, MD  
Boston, MA: K. Sophia Dyer, MD  
Capetown, South Africa: Shaheem de Vries, MD  
Charleston, SC: David M. French, MD  
Charlotte, NC: Doug Swanson, MD  
Chicago, IL: Joseph Weber, MD; Katie Tataris, MD and Eddie Markul, MD  
Cleveland, OH: Thomas Collins, MD  
Colorado Springs, CO: E. Stein Bronsky, MD and Mark Warth, NRP  
Columbus, OH: Robert A. Lowe, MD  
Dallas, TX: S. Marshal Isaacs, MD and Ray Fowler, MD  
Dayton, OH: David N. Gerstner, EMT-P  
Denver, CO: Kevin McVaney, MD  
Detroit, MI: Robert B. Dunne, MD and Damon Gorelick, EMT-P  
Fort Lauderdale, FL: James P. Roach, DO  
Fort Worth, TX: Veer D. Vithalani, MD  
Honolulu, HI: Elizabeth A. Char, MD and Sean Covant, MD  
Houston, TX: David E. Persse, MD  
Indianapolis, IN: Daniel O'Donnell, MD  
Jacksonville, FL: Brad Elias, MD  
Kansas City, MO: Erica Carney, MD  
Las Vegas, NV: David Slattery, MD  
Little Rock, AR: Chuck Mason, MD  
London, UK: Fenella Wrigley, FRCESM and Rachael T. Fothergill, BSc (Hons), PhD  
Los Angeles, CA: Marc K. Eckstein, MD  
Madison, WI: Megan Gussick, MD  
Memphis, TN: Joe Holley, MD

Melbourne, Australia: Stephen Bernard, MD, David Anderson, MD, MStJ, MBChB  
Miami, FL: Paul Adams, DO and Armando Clift, MD  
Milan, Italy: Roberto Fumagalli, MD  
Milwaukee, WI: Benjamin W Weston, MD, MPH  
Minneapolis, MN: Marc Conterato, MD and Nicholas Simpson, MD  
Nashville, TN: Corey Slovis, MD  
New Orleans, LA: Megan Marino, MD and Emily M Nichols, MD  
New York City, NY: Glenn Asaeda, MD  
Oklahoma City, OK: Jeffrey M. Goodloe, MD  
Orlando, FL: Christian C. Zuver, MD; Alexa Rodriguez, MD and Amy Souers, MD  
Paris, France: Pierre A. Carli, MD  
Perth, Australia: Paul Bailey, MB, FACEM, PhE  
Philadelphia, PA: C. Crawford Mechem, MD  
Phoenix, AZ: Garth Gemar, MD  
Pittsburgh, PA: Ronald Roth, MD  
Portland, OR: Jonathan Jui MD, MPH  
Raleigh, NC: Jose G. Cabanas, MD, MPH  
Regional Louisiana/Texas / Acadian Ambulance: Chuck Burnell, MD  
Sacramento, CA: Kevin E. Mackey MD  
Salt Lake City, UT: Scott T Youngquist, MD, MS  
San Antonio, TX: David A. Miramontes, MD and C.J. Winckler, MD  
San Diego, CA: Christopher Kahn, MD, MPH and J. Joelle Donofrio-Odmann DO  
San Francisco, CA: Christopher B. Colwell, MD  
San Jose, CA: Marc Gautreau, MD and Eli Carrillo, MD  
Seattle, WA: Michael Sayre, MD and Andrew McCoy, MD  
South East Coast Ambulance Service NHS Foundation Trust,  
West Sussex, UK: Fionna P. Moore, MD, MBE  
Singapore, SG: Marcos Ong En Hock, MD  
St. Louis, MO: William S. Gilmore, MD  
St. Paul, MN: Ralph Frascone, MD  
Tampa, FL: Angus Jameson, MD; Rachel Semmons, MD; Andrew Thomas, MD;  
Michael Lozano, MD  
Tucson, AZ: Joshua Gaither, MD  
Tulsa, OK: Jeffrey M. Goodloe, MD  
Washington, DC: Robert P. Holman, MD  
West Palm Beach, FL: Kenneth A Scheppeke, MD  
Wichita, KS: John Gallagher, MD
